# Supplementary material for: Evaluation of commercial diets on fecal consistency and defecation frequency in rhesus macaques (Macaca mulatta) with chronic intermittent idiopathic diarrhea
Source: Springer Nature journal article supplement (doi:10.1186/s42826-025-00246-6), 2025-05-20
Supplement: MOESM1 [file 42826_2025_246_MOESM1_ESM.pdf]

### ***Additional file 1***

*Table A1. Diet coding, product names and manufacturer details.*

| <b>Diet</b> | <b>Product name</b>    | <b>Manufacturer</b>                        |
|-------------|------------------------|--------------------------------------------|
| STAN        | Primate/NHP pellets    | Ssniff, Soest, Germany                     |
| LCMF-ex     | Extrudate 6029         | Altromin, Lage, Germany                    |
| LCMF-hy     | Hybrid 6028            | Altromin, Lage, Germany                    |
| LFLF        | Primate/NHP vegetarian | Ssniff, Soest, Germany                     |
| LFHF        | Primate PT 1 pellets   | Kasper Faunafood, Woerden, the Netherlands |
